# Supplementary material for: Differential expression of GABAA receptor subunits δ and α6 mediates tonic inhibition in parvalbumin and somatostatin interneurons in the mouse hippocampus
Source: PubMed Central journal article supplement (PMC10397515; doi:10.3389/fncel.2023.1146278), 2023-07-20
Supplement: Table_1.pdf [file Table_1.pdf]

**Supplementary Table 1.** Chemicals and products list.

| <b>Experiment</b>                        | <b>Product</b>                                                | <b>Supplier</b>          | <b>Catalog No.</b> |
|------------------------------------------|---------------------------------------------------------------|--------------------------|--------------------|
| mRNA extraction from HA-tagged ribosomes | Trizma <sup>®</sup> hydrochloride solution                    | Sigma-Aldrich            | T2663              |
|                                          | MgCl <sub>2</sub> (1M)                                        | Thermo Fisher Scientific | AM9530G            |
|                                          | KCl (2M)                                                      | Thermo Fisher Scientific | AM9640G            |
|                                          | Dithiothreitol (DTT)                                          | Omics Bio                | DB0058             |
|                                          | NONIDET P-40 SUBSTITUTE                                       | BioShop Canada Inc.      | NON505             |
|                                          | Recombinant RNasin <sup>®</sup> Ribonuclease Inhibitor        | Promega Corporation      | N251B              |
|                                          | Heparin                                                       | Sigma-Aldrich            | H3393              |
|                                          | cOmplete <sup>™</sup> , EDTA-free Protease Inhibitor Cocktail | Roche                    | 4693132001         |
|                                          | UltraPure <sup>™</sup> DNase/RNase-Free Distilled Water       | Thermo Fisher Scientific | 10977015           |
|                                          | Dynabeads <sup>™</sup> Protein G for Immunoprecipitation      | Thermo Fisher Scientific | 10003D             |
|                                          | Citric acid                                                   | Thermo Fisher Scientific | 251275             |
|                                          | Sodium Phosphate, Dibasic                                     | Millipore                | 567547             |
|                                          | Ethanol                                                       | Bioman Scientific        | E23                |
|                                          | 2-Mercaptoethanol                                             | Sigma-Aldrich            | M7154              |
| RNeasy Micro Kit                         | QIAGEN                                                        | 74004                    |                    |
| PCR and RT-qPCR                          | 2X PCR Dye Master Mix                                         | ARROWTEC                 | ADPMX02D-100       |
|                                          | 2X PCR BIO VeriFi Mix Red                                     | PCR Biosystems           | SA-PB10.44-5       |
|                                          | 2X qPCR BIO SyGreen Blue Mix HI-ROX                           | PCR Biosystems           | PB20.16-01         |
| Immuno-histochemistry                    | Paraformaldehyde                                              | Sigma-Aldrich            | P6148              |
|                                          | Sucrose                                                       | Bio Basic Inc.           | SB0498             |
|                                          | Tissue-Tek <sup>®</sup> O.C.T. Compound                       | Sakura Finetek USA, Inc. | 4583               |
|                                          | 10X PBS buffer, pH7.4                                         | Omics Bio                | IB3012             |
|                                          | Triton X-100                                                  | Bio Basic Inc.           | DB0198             |
|                                          | FBS                                                           | NQBB                     | A6806-11           |
|                                          | Bovine Serum Albumin (BSA) Fraction V                         | Bio Basic Inc.           | AD0023             |
|                                          | Sodium azide                                                  | Honeywell Riedel-de Haen | 13412              |
|                                          | Antifade Mounting Medium with DAPI                            | Vector Laboratories.     | H-1200             |
