# Supplementary material for: Differential expression of GABAA receptor subunits δ and α6 mediates tonic inhibition in parvalbumin and somatostatin interneurons in the mouse hippocampus
Source: PubMed Central journal article supplement (PMC10397515; doi:10.3389/fncel.2023.1146278), 2023-07-20
Supplement: Table_2.pdf [file Table_2.pdf]

**Supplementary Table 2.** Antibodies used in this study.

| <b>Experiment</b>                                | <b>Immunogen</b>                | <b>Host species</b> | <b>Supplier</b>         | <b>Catalog No.</b> | <b>Dilution</b> |
|--------------------------------------------------|---------------------------------|---------------------|-------------------------|--------------------|-----------------|
| RiboTag immunoprecipitation                      | HA tag                          | Rabbit Polyclonal   | Abcam                   | ab9110             | 1:50            |
| Immunoblotting (Primary antibody)                | HA tag                          | Rabbit Polyclonal   | Abcam                   | ab9110             | 1:1000          |
|                                                  | beta III Tubulin                | Mouse Monoclonal    | Abcam                   | ab7751             | 1:2000          |
| Immunoblotting (Secondary antibody)              | HRP-conjugated Anti-Mouse IgG   | Goat Polyclonal     | Jackson Immuno-Research | 115-035-003        | 1:1000          |
|                                                  | HRP-conjugated Anti-Rabbit IgG  | Mouse Monoclonal    | Rockland                | 18-8816-31         | 1:1000          |
| Immunofluorescence staining (Primary antibody)   | HA tag                          | Rabbit Polyclonal   | GeneTex                 | GTX115044          | 1:200           |
|                                                  | HA.11 Epitope Tag               | Mouse Monoclonal    | BioLegend               | MMS-101R           | 1:200           |
|                                                  | Somatostatin                    | Rat Monoclonal      | Millipore               | MAB354             | 1:100           |
|                                                  | Parvalbumin                     | Mouse Monoclonal    | Millipore               | MAB1572            | 1:1000          |
|                                                  | GABRD (extracellular)           | Rabbit Polyclonal   | Invitrogen              | PA5-77408          | 1:200           |
|                                                  | GABA-AR alpha 6                 | Rabbit Polyclonal   | Novus Biologicals       | NB300-196          | 1:200           |
| Immunofluorescence staining (Secondary antibody) | Alexa Fluor 488 anti-rabbit IgG | Goat Polyclonal     | Invitrogen              | A11008             | 1:500           |
|                                                  | Alexa Fluor 594 anti-rabbit IgG | Goat Polyclonal     | Invitrogen              | A11012             | 1:500           |
|                                                  | Alexa Fluor 488 anti-mouse IgG  | Goat Polyclonal     | Invitrogen              | A11001             | 1:500           |
|                                                  | Alexa Fluor 594 anti-rat IgG    | Goat Polyclonal     | Invitrogen              | A11007             | 1:1000          |
