# Supplementary material for: Differential expression of GABAA receptor subunits δ and α6 mediates tonic inhibition in parvalbumin and somatostatin interneurons in the mouse hippocampus
Source: PubMed Central journal article supplement (PMC10397515; doi:10.3389/fncel.2023.1146278), 2023-07-20
Supplement: Table_3.pdf [file Table_3.pdf]

**Supplementary Table 3.** List of mice information in this study.

| <b>Figure/<br/>Experiment</b>                             | <b>Age</b> | <b>Number/<br/>Gender</b> | <b>Genotype</b> | <b>Statistical analysis</b>                                                           |
|-----------------------------------------------------------|------------|---------------------------|-----------------|---------------------------------------------------------------------------------------|
| 1E<br><i>Gfap</i><br>RT-qPCR                              | 3 mon      | 6 females                 | SST-RiboTag     | Mann-Whitney test, two-tailed<br><i>p</i> value=0.0649<br>Actual Difference:-0.02608  |
|                                                           | 3 mon      | 6 females                 | PV-RiboTag      |                                                                                       |
| 1E<br><i>Cnpl</i><br>RT-qPCR                              | 3 mon      | 7 females                 | SST-RiboTag     | Mann-Whitney test, two-tailed<br><i>p</i> value=0.7922<br>Actual Difference:-0.004657 |
|                                                           | 3 mon      | 1 male<br>6 females       | PV-RiboTag      |                                                                                       |
| 1E<br><i>Ibal</i><br>RT-qPCR                              | 3 mon      | 6 females                 | SST-RiboTag     | Mann-Whitney test, two-tailed<br><i>p</i> value=0.5887<br>Actual Difference:0.03880   |
|                                                           | 3 mon      | 3 males<br>3 females      | PV-RiboTag      |                                                                                       |
| 1E<br><i>Camk2a</i><br>RT-qPCR                            | 3 mon      | 6 females                 | SST-RiboTag     | Mann-Whitney test, two-tailed<br><i>p</i> value=0.1508<br>Actual Difference:-0.01952  |
|                                                           | 3 mon      | 5 females                 | PV-RiboTag      |                                                                                       |
| 1E<br><i>Gad1</i><br>RT-qPCR                              | 3 mon      | 1 male<br>6 females       | SST-RiboTag     | Mann-Whitney test, two-tailed<br><i>p</i> value=0.0260<br>Actual Difference:2.538     |
|                                                           | 3 mon      | 6 females                 | PV-RiboTag      |                                                                                       |
| 1E<br><i>Pvalb</i><br>RT-qPCR                             | 3 mon      | 1 male<br>9 females       | SST-RiboTag     | Mann-Whitney test, two-tailed<br><i>p</i> value=0.0002<br>Actual Difference:20.70     |
|                                                           | 3 mon      | 6 females                 | PV-RiboTag      |                                                                                       |
| 1E<br><i>Sst</i><br>RT-qPCR                               | 3 mon      | 1 male<br>10 females      | SST-RiboTag     | Mann-Whitney test, two-tailed<br><i>p</i> value=0.0002<br>Actual Difference:-20.03    |
|                                                           | 3 mon      | 6 females                 | PV-RiboTag      |                                                                                       |
| 2BCDEF, 4BC, 6ABC<br>RNAseq and bioinformatic<br>analysis | 3 mon      | 5 males                   | SST-RiboTag     | Please see supplement<br>table 5-9 for more detail                                    |
|                                                           | 3 mon      | 7 males                   | PV-RiboTag      |                                                                                       |
| 2G<br><i>Cacna2d3</i><br>RT-qPCR                          | 3 mon      | 2 males<br>4 females      | SST-RiboTag     | Mann-Whitney test, two-tailed<br><i>p</i> value=0.0016<br>Actual Difference:-0.4086   |
|                                                           | 3 mon      | 6 males<br>3 females      | PV-RiboTag      |                                                                                       |
| 2G<br><i>Scn4b</i><br>RT-qPCR                             | 3 mon      | 2 males<br>5 females      | SST-RiboTag     | Mann-Whitney test, two-tailed<br><i>p</i> value=0.0003<br>Actual Difference:2.918     |
|                                                           | 3 mon      | 5 males<br>4 females      | PV-RiboTag      |                                                                                       |
| 2G<br><i>Kcnc3</i><br>RT-qPCR                             | 3 mon      | 2 males<br>5 females      | SST-RiboTag     | Mann-Whitney test, two-tailed<br><i>p</i> value=0.0006<br>Actual Difference:0.9511    |
|                                                           | 3 mon      | 4 males<br>3 females      | PV-RiboTag      |                                                                                       |

|                                  |         |                      |                               |                                                                                |
|----------------------------------|---------|----------------------|-------------------------------|--------------------------------------------------------------------------------|
| 2G<br><i>Kcng4</i><br>RT-qPCR    | 3 mon   | 2 males<br>4 females | SST-RiboTag                   | Mann-Whitney test, two-tailed<br>$p$ value=0.0012<br>Actual Difference:3.411   |
|                                  | 3 mon   | 4 males<br>3 females | PV-RiboTag                    |                                                                                |
| 2G<br><i>Grin3a</i><br>RT-qPCR   | 3 mon   | 3 males<br>4 females | SST-RiboTag                   | Mann-Whitney test, two-tailed<br>$p$ value=0.0012<br>Actual Difference:-0.9946 |
|                                  | 3 mon   | 3 males<br>3 females | PV-RiboTag                    |                                                                                |
| 4D<br><i>Gabrd</i><br>RT-qPCR    | 3 mon   | 6 females            | SST-RiboTag                   | Mann-Whitney test, two-tailed<br>$p$ value=0.0022<br>Actual Difference:2.175   |
|                                  | 3 mon   | 1 male<br>5 females  | PV-RiboTag                    |                                                                                |
| 4D<br><i>Gabra6</i><br>RT-qPCR   | 3 mon   | 6 females            | SST-RiboTag                   | Mann-Whitney test, two-tailed<br>$p$ value=0.0043<br>Actual Difference:9.562   |
|                                  | 3 mon   | 1 male<br>5 females  | PV-RiboTag                    |                                                                                |
| 5B<br>immunofluorescence images  | 3 mon   | 3 males<br>2 females | SST-RiboTag                   | Mann-Whitney test, two-tailed<br>$p$ value=0.0079<br>Actual difference:30.82   |
|                                  | 3 mon   | 2 males<br>3 females | PV-RiboTag                    |                                                                                |
| 5D<br>immunofluorescence images  | 3 mon   | 3 males<br>2 females | SST-RiboTag                   | Mann-Whitney test, two-tailed<br>$p$ value=0.0079<br>Actual Difference:24.40   |
|                                  | 3 mon   | 2 males<br>3 females | PV-RiboTag                    |                                                                                |
| 5G<br>Tonic GABA current         | 2-3 mon | 3 males<br>2 females | SST-Cre; Ai14                 | Mean-Whitney test, two-tailed<br>$p$ value=0.0175<br>Actual Difference:14.67   |
|                                  | 2-3 mon | 3 males<br>2 females | PV-Cre; Ai14                  |                                                                                |
| 5H<br>Tonic GABA current density | 2-3 mon | 3 males<br>2 females | SST-Cre; Ai14                 | Mann-Whitney test, two-tailed<br>$p$ value=0.0262<br>Actual Difference:0.2498  |
|                                  | 2-3 mon | 3 males<br>2 females | PV-Cre; Ai14                  |                                                                                |
| 5K<br>Tonic GABA current         | 4-6 mon | 1 male<br>1 female   | SST-Cre; Ai14                 | Mann-Whitney test, two-tailed<br>$p$ value=0.0451<br>Actual Difference: 41.10  |
|                                  | 4-6 mon | 2 males<br>1 female  | PV-Cre; Virus<br>PV-Cre; Ai14 |                                                                                |
| 5L<br>Tonic GABA current density | 4-6 mon | 1 male<br>1 female   | SST-Cre; Ai14                 | Mann-Whitney test, two-tailed<br>$p$ value=0.0451<br>Actual Difference: 0.7375 |
|                                  | 4-6 mon | 2 males<br>1 female  | PV-Cre; Virus<br>PV-Cre; Ai14 |                                                                                |
