# Supplementary material for: Differential expression of GABAA receptor subunits δ and α6 mediates tonic inhibition in parvalbumin and somatostatin interneurons in the mouse hippocampus
Source: PubMed Central journal article supplement (PMC10397515; doi:10.3389/fncel.2023.1146278), 2023-07-20
Supplement: Table_4.pdf [file Table_4.pdf]

**Supplementary Table 4.** Primer list for RT-qPCR.

| <b>Gene name</b> | <b>Primer sequence (5'→3')</b> | <b>Gene accession number</b>      |
|------------------|--------------------------------|-----------------------------------|
| <i>Cacna2d3</i>  | Fwd: TGGTGGGGAGATAAAAATCCA     | NM_009785.1                       |
|                  | Rev: CCTCGGACTTCTTGTGGAAC      |                                   |
| <i>Camk2a</i>    | Fwd: TTTGAGGAACTGGGAAAGGG      | NM_177407.4                       |
|                  | Rev: CATGGAGTCGGACGATATTGG     |                                   |
| <i>Cnp1</i>      | Fwd: GCTGCACTGTACAACCAAATTCTG  | NM_001146318.1                    |
|                  | Rev: ACCTCCTGCTGGGCGTATT       |                                   |
| <i>Gabra6</i>    | Fwd: CTCTACCCAAAGTGTCCTATGC    | NM_001359049.1                    |
|                  | Rev: GTGACTGGAGATTGGTGAAGTAG   |                                   |
| <i>Gabrd</i>     | Fwd: CCTTCATCGTGAATGCCAAATC    | NM_008072.2                       |
|                  | Rev: GGTGATGCGGATGCTGTATAA     |                                   |
| <i>Gad1</i>      | Fwd: TTGTGCTTTGCTGTGTTTTAGAGA  | NM_008077.5                       |
|                  | Rev: CCCCCTGCCCAAAGATAGAC      |                                   |
| <i>Gapdh</i>     | Fwd: GCATCCACTGGTGCTGCC        | NM_001289726.1                    |
|                  | Rev: TCATCATACTTGGCAGGTTTC     |                                   |
| <i>Gfap</i>      | Fwd: AGCGAGCGTGCAGAGATGA       | NM_001131020.1                    |
|                  | Rev: AGGAAGCGGACCTTCTCGAT      |                                   |
| <i>Grin3a</i>    | Fwd: TTGTCATGGACTCGGGAATATG    | NM_001276355.1                    |
|                  | Rev: TTCAATCAGTGTCACTACTCTC    |                                   |
| <i>Iba1</i>      | Fwd: CCCCAGCCAAGAAAGCTAT       | NM_001361501.1                    |
|                  | Rev: GCCCCACCGTGTGACATC        |                                   |
| <i>Kcnc3</i>     | Fwd: CTAAGGTCGGAGCTAGCATTT     | NM_008422.3                       |
|                  | Rev: TCCTACGTGTTCTAGAGGTT      |                                   |
| <i>Kcng4</i>     | Fwd: CAGGCAGAGAGTGGTTCTATT     | NM_025734.2                       |
|                  | Rev: TGGATTCCACCACGAAGATG      |                                   |
| <i>Pvalb</i>     | Fwd: TGTCGATGACAGACGTGCTC      | NM_013645<br>(Filice et al. 2016) |
|                  | Rev: TTCTTCAACCCCAATCTTGC      |                                   |
| <i>Scn4b</i>     | Fwd: CCACCAAGGAGAAGACGAATAA    | NM_001013390.3                    |
|                  | Rev: CCTCACGAAGCAGGTGTATC      |                                   |
| <i>Sst</i>       | Fwd: GCCCAACCAGACAGAGAATGA     | NM_009215.1                       |
|                  | Rev: AAGTTCTTGCAGCCAGCTTTG     |                                   |
